# Supplementary material for: Nonlinear Association Between Blood Cadmium Levels and Periodontitis: A Cross-Sectional Study from NHANES 2011-2014
Source: Research Square preprint supplement (doi:10.21203/rs.3.rs-6190945/v1), 2025-04-01
Supplement: Supplementary file 1 [file 76ce279e138893cbd6f3e731.docx]

**Figure S1** Forest plots of stratified analysis of cadmium with periodontitis.
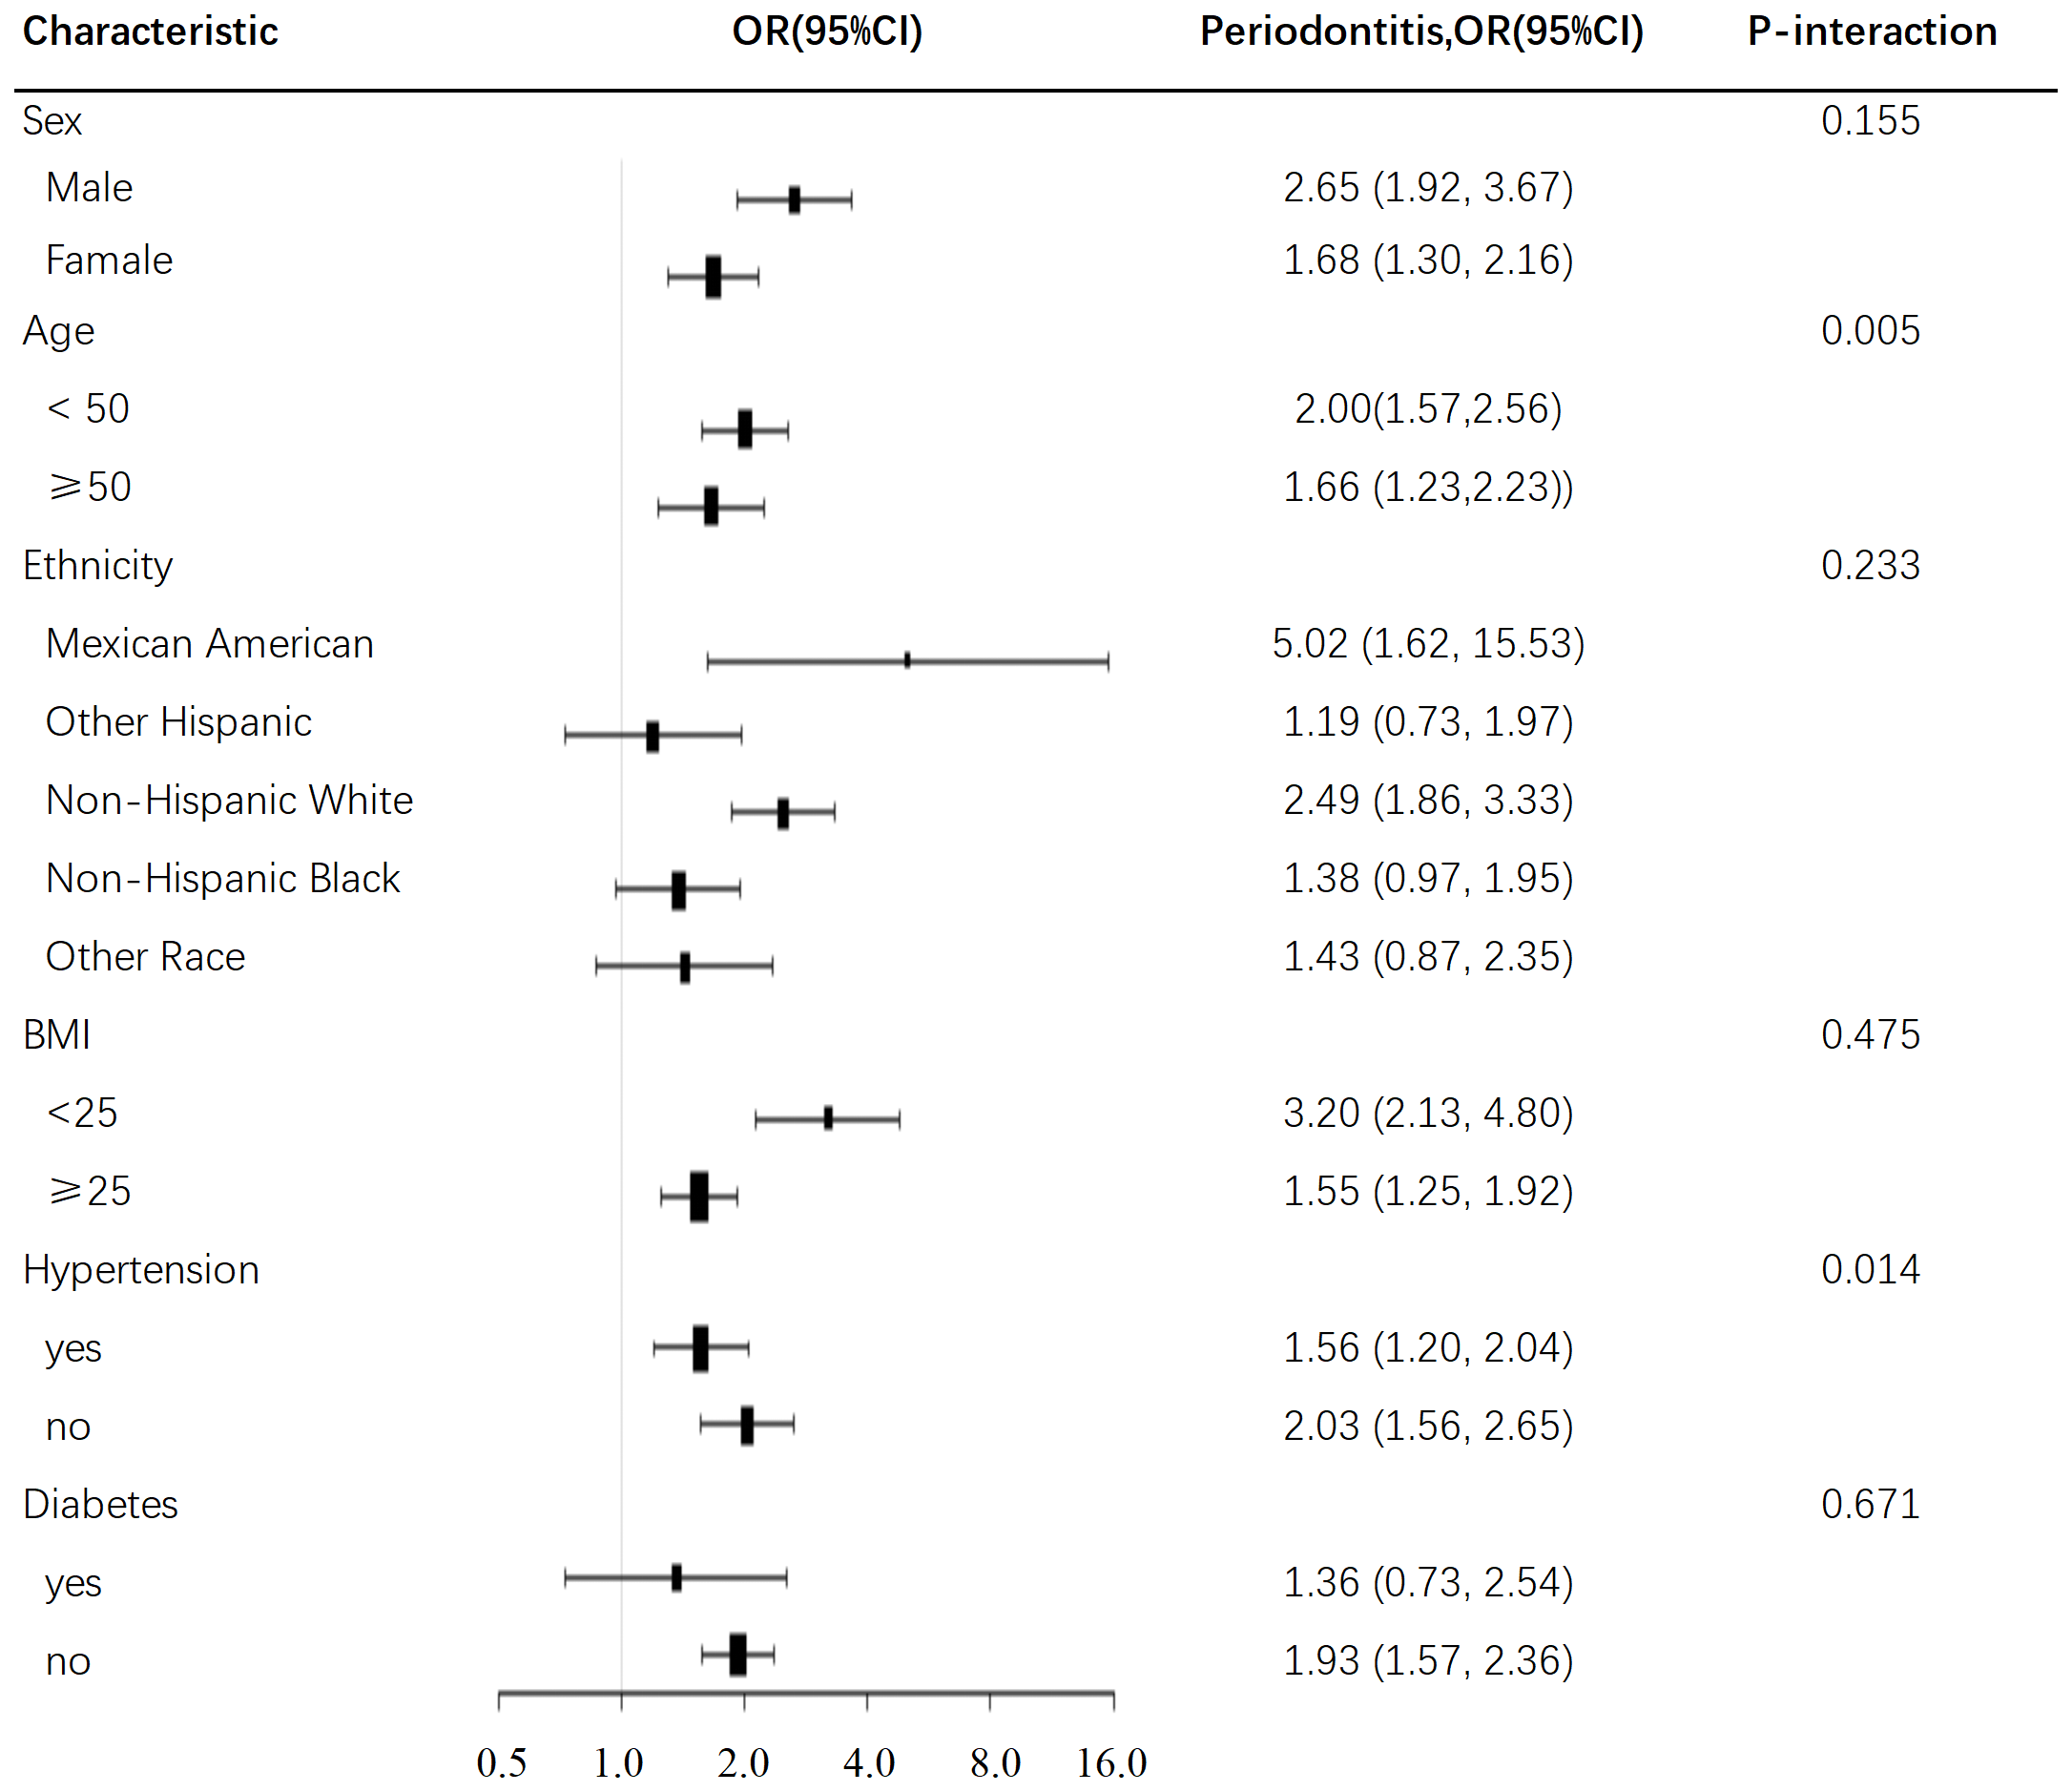


Note: Age, gender, race/ethnicity, PIR, BMI, smoking status, Vitamin D, Hypertension, Diabetes were all adjusted except the variable itself.

Abbreviations: OR: odd ratio; CI: confidence interval

**Table S2** Logistic regression analyses of the associations between cadmium and periodontitis

|  | Non-adjusted | Adjust I (Complete case) | Adjust II (Multiple imputation) |
| --- | --- | --- | --- |
|  | 1.83 (1.52, 2.21) <0.05 | 1.51 (1.22, 1.86) <0.05 | 1.51 (1.21, 1.86) <0.05 |
| Cadmium quartile |  |  |  |
| Low | 1.0 | 1.0 | 1.0 |
| Middle | 1.30 (0.75, 2.25) 0.35 | 1.38 (0.76, 2.51) 0.29 | 1.39 (0.76, 2.52) 0.28 |
| High | 2.06 (1.22, 3.49) <0.05 | 1.71 (0.94, 3.10) 0.08 | 1.71 (0.94, 3.11) 0.08 |

Note: Adjusted for age, gender, race/ethnicity, PIR, BMI, smoking status, Vitamin D, Hypertension, Diabetes

Abbreviations: OR: odd ratio; CI: confidence interval
